# Supplementary material for: Involvement of BIG5 and BIG3 in BRI1 Trafficking Reveals Diverse Functions of BIG-subfamily ARF-GEFs in Plant Growth and Gravitropism
Source: MDPI journal article supplement (doi:10.3390/ijms20092339), 2019-05-11
Supplement: s1 [file s1]

Table S1. Primers used in this study

| No. | Name          | Forward<br>(5'-sequence-3')   | Reverse<br>(5'-sequence-3') | Note                                             |
|-----|---------------|-------------------------------|-----------------------------|--------------------------------------------------|
| 1   | <i>big1-1</i> | GGATTAGGATGCGA<br>GGAGATC     | CGGTGATAAAATTG<br>TTGGACG   | wild-type identify                               |
| 2   | <i>big1-1</i> | GGATTAGGATGCGA<br>GGAGATC     | TGGTTCACGTAGTG<br>GGCCATCG  | T-DNA insertion<br>identify                      |
| 3   | <i>big2-1</i> | TTTCCCACTTTTTTC<br>CACTGTG    | TTGAGGGGTTTCATA<br>TGACAGC  | wild-type identify                               |
| 4   | <i>big2-1</i> | TTTCCCACTTTTTTC<br>CACTGTG    | TGGTTCACGTAGTG<br>GGCCATCG  | T-DNA insertion<br>identify                      |
| 5   | <i>big3-1</i> | AAACTCTCCACTGG<br>CTAAGCC     | GCAAGTTTTCTTGC<br>GCAATAC   | wild-type identify                               |
| 6   | <i>big3-1</i> | AAACTCTCCACTGG<br>CTAAGCC     | TGGTTCACGTAGTG<br>GGCCATCG  | T-DNA insertion<br>identify                      |
| 7   | <i>big4-1</i> | AAACCCACAATAAT<br>CTATGGCC    | AATCGGTTCTTCGG<br>CTATAGC   | wild-type identify                               |
| 8   | <i>big4-1</i> | AAACCCACAATAAT<br>CTATGGCC    | TGGTTCACGTAGTG<br>GGCCATCG  | T-DNA insertion<br>identify                      |
| 9   | <i>big5-1</i> | CCGTCGTATCTCCG<br>ACGATCTT    | CCCCGAAGATGAC<br>AAGTTCAA   | wild-type identify                               |
| 10  | <i>big5-1</i> | CCGTCGTATCTCCG<br>ACGATCTT    | GGGCTACACTGAAT<br>TGGTAGCTC | T-DNA insertion<br>identify                      |
| 11  | <i>BIG1</i>   | TCATTGATAACGGC<br>GGCCCA      | ACAGCGACAAGCA<br>GAGCAACT   | For BIG1<br>expression level<br>test             |
| 12  | <i>BIG2</i>   | CTAAGTGCCGAGC<br>CGCTGTT      | CCGTGCAATGCATC<br>TACGAGGA  | For BIG2<br>expression level<br>test, N terminal |
| 13  | <i>BIG2</i>   | TCGGCAGATCCGC<br>AGTCGAT      | AGCACTGTTCTTCA<br>ACAACGACA | For BIG2<br>expression level<br>test, C terminal |
| 14  | <i>BIG3</i>   | TGCTGTCGTCACA<br>GATGCCA      | ATGCCGTGCATAGC<br>GTCGAA    | For BIG3<br>expression level<br>test, N terminal |
| 15  | <i>BIG3</i>   | TGAGAATGCCGGT<br>GCTGTCT      | GCCTTCAGCCCAG<br>CACGAAA    | For BIG3<br>expression level<br>test, C terminal |
| 16  | <i>BIG4</i>   | ACATACTTGAAAGG<br>ATTGTCAACGG | ATCTTGCGCTGGAG<br>ACAACG    | For BIG4<br>expression level<br>test             |
| 17  | <i>BIG5</i>   | CTGCATGGAGGGA<br>TTTAAAGCTGGA | TCTGAGTCACACAA<br>CCCCAGT   | For BIG5<br>expression level<br>test             |

|    |                              |                                  |                                  |                                                                              |
|----|------------------------------|----------------------------------|----------------------------------|------------------------------------------------------------------------------|
| 18 | <i>BIG3</i>                  | ATGGCTTCTACGGA<br>AGTCGATTT      | GCAGCAAGAGCGG<br>AGGAGAACA       | For amplification<br>BIG3 coding<br>sequence                                 |
| 19 | <i>BIG5</i>                  | ATGGCGGCTGGTG<br>GATTTTTGA       | CTGTTGCAAAAGTG<br>GCTTC          | For amplification<br>BIG5 coding<br>sequence                                 |
| 20 | <i>BIG5</i> <sup>M731L</sup> | AGCCTATGCAGTTA<br>TCTTATTAAATACA | GATTATGCGCATCT<br>GTATTTAATAAGAT | For introducing<br>an ATG (M) to<br>CTG (L) mutate in<br>BIG5 SEC7<br>domain |
| 21 | <i>pBIG1</i>                 | TTACCTTCTTGTTG<br>ATTTTGGCA      | CTAACGCATATTCG<br>ACTTCTCAC      | For amplification<br>BIG1 promoter<br>rejoin                                 |
| 22 | <i>pBIG2</i>                 | CACACATCTCGTTA<br>TGCATACCC      | TCCCAATTTTCACG<br>GCGAGCTCA      | For amplification<br>BIG2 promoter<br>rejoin                                 |
| 23 | <i>pBIG3</i>                 | GGCCGTATGATTTT<br>ACATGAACC      | TCCAGATTGGTAGC<br>CGTGACTTC      | For amplification<br>BIG3 promoter<br>rejoin                                 |
| 24 | <i>pBIG4</i>                 | CGACTCCCATTGTA<br>AATGATCCG      | CGCCGAAAATCAA<br>AAGTTTTGA       | For amplification<br>BIG4 promoter<br>rejoin                                 |
| 25 | <i>pBIG5</i>                 | GAAAAGCTTTGAAC<br>TGTCCAC        | CTTTAATCCTTCCTA<br>TTTCGACT      | For amplification<br>BIG5 promoter<br>rejoin                                 |

Table S2. Detail of the key reagent and source information

| REAGENT or RESOURCE                                  | SOURCE                                                            | IDENTIFIER                                                        |
|------------------------------------------------------|-------------------------------------------------------------------|-------------------------------------------------------------------|
| <b>Antibodies</b>                                    |                                                                   |                                                                   |
| anti-CFP monoclonal antibody                         | pierce                                                            | CAT#PA526939                                                      |
| HRP-conjugated anti-mouse antibody                   | Abcam                                                             | CAT#ab19195                                                       |
| <b>Chemicals, Peptides, and Recombinant Proteins</b> |                                                                   |                                                                   |
| BFA                                                  | Sigma-Aldrich                                                     | CAT#87022601                                                      |
| eBL                                                  | Sigma-Aldrich                                                     | CAT#E1641-2MG                                                     |
| RNase-free DNase                                     | Takara                                                            | CAT#2270A                                                         |
| protease inhibitor cocktails                         | Roche                                                             | CAT#4693116001                                                    |
| FM4-64                                               | Invitrogen                                                        | CAT#F34653                                                        |
| Bikinin                                              | MCE                                                               | CAT#HY-12524                                                      |
| InStab <sup>TM</sup> Phosphatase Inhibitor Cocktail  | Yeasen                                                            | CAT#20109ES05                                                     |
| <b>Critical Commercial Assays</b>                    |                                                                   |                                                                   |
| Plant Total RNA isolation kit                        | Magen                                                             | CAT#MD5215-01                                                     |
| iScript cDNA synthesis kit                           | Promega                                                           | CAT#A6001                                                         |
| Super Signal West Dura chemiluminescence reagent Kit | Pierce                                                            | CAT#34075                                                         |
| <b>Experimental Models: Organisms/Strains</b>        |                                                                   |                                                                   |
| BRI1-GFP                                             | Friedrichsen et al., 2000; Wang et al., 2001                      | N/A                                                               |
| BZR1-CFP                                             | Wang et al., 2002                                                 | N/A                                                               |
| BZR1-D-CFP                                           | Wang et al., 2002                                                 | N/A                                                               |
| PIN1-GFP                                             | Friml et al., 2002; Benkova' et al., 2003                         | N/A                                                               |
| PIN2-GFP                                             | Xu and Scheres, 2005 ; Blilou et al., 2005                        | N/A                                                               |
| ST-RFP                                               | Naramoto, 2014                                                    | N/A                                                               |
| VHA-α1-RFP                                           | Naramoto, 2014                                                    | N/A                                                               |
| BIG5-GFP                                             | This paper                                                        | N/A                                                               |
| BIG5 <sup>M731L</sup> -GFP                           | This paper                                                        | N/A                                                               |
| pBIG1:GUS                                            | This paper                                                        | N/A                                                               |
| pBIG2:GUS                                            | This paper                                                        | N/A                                                               |
| pBIG3:GUS                                            | This paper                                                        | N/A                                                               |
| pBIG4:GUS                                            | This paper                                                        | N/A                                                               |
| pBIG5:GUS                                            | This paper                                                        | N/A                                                               |
| <b>Recombinant DNA</b>                               |                                                                   |                                                                   |
| pEasy-Blunt vector                                   | Transgene                                                         | N/A                                                               |
| pSuper1300-221 vector                                |                                                                   |                                                                   |
| pCAMBIA1300-221 vector                               |                                                                   |                                                                   |
| <b>Software</b>                                      |                                                                   |                                                                   |
| ImageJ                                               | <a href="http://rsbweb.nih.gov/ij/">http://rsbweb.nih.gov/ij/</a> | <a href="http://rsbweb.nih.gov/ij/">http://rsbweb.nih.gov/ij/</a> |
